# Supplementary material for: Relationship between telomere shortening and early subjective depressive symptoms and cognitive complaints in older adults
Source: PubMed Central journal article supplement (PMC10008503; doi:10.18632/aging.204533), 2023-02-17
Supplement: aging-15-204533-s002.pdf [file aging-15-204533-s002.pdf]

## SUPPLEMENTARY TABLE

**Supplementary Table 1. Univariable linear regression of the telomere length according to the same variables used in the multivariable analysis model.**

| Univariable linear regression for telomere length |                                  |              |
|---------------------------------------------------|----------------------------------|--------------|
| Baseline                                          |                                  |              |
| Variable                                          | $\beta$ (95% CI)                 | p            |
| Female                                            | -0.180 (-0.592 to 0.232)         | 0.390        |
| Age                                               | -0.006 (-0.043 to 0.032)         | 0.768        |
| BMI                                               | 0.015 (-0.051 to 0.080)          | 0.656        |
| Hypertension                                      | 0.027 (-0.336 to 0.390)          | 0.882        |
| Diabetes                                          | 0.197 (-0.255 to 0.649)          | 0.390        |
| Hyperlipidemia                                    | -0.058 (-0.418 to 0.303)         | 0.753        |
| Heart disease                                     | 0.123 (-0.454 to 0.699)          | 0.674        |
| Stroke history                                    | 0.015 (-0.580 to 0.610)          | 0.960        |
| GDS-KR                                            | <b>-0.064 (-0.110 to -0.018)</b> | <b>0.007</b> |
| CCI                                               | <b>-0.144 (-0.225 to -0.063)</b> | <b>0.001</b> |
| IL-6                                              | <b>-0.085 (-0.145 to -0.024)</b> | <b>0.006</b> |
| After 6 months of follow-up                       |                                  |              |
| Variable                                          | $\beta$ (95% CI)                 | p            |
| Female                                            | 0.012 (-0.411 to 0.436)          | 0.954        |
| Age                                               | -0.005 (-0.043 to 0.034)         | 0.804        |
| BMI                                               | 0.012 (-0.055 to 0.080)          | 0.721        |
| Hypertension                                      | -0.074 (-0.446 to 0.298)         | 0.695        |
| Diabetes                                          | 0.186 (-0.278 to 0.649)          | 0.430        |
| Hyperlipidemia                                    | 0.041 (-0.329 to 0.411)          | 0.828        |
| Heart disease                                     | 0.205 (-0.386 to 0.796)          | 0.494        |
| Stroke history                                    | -0.118 (-0.728 to 0.492)         | 0.703        |
| GDS-KR                                            | <b>-0.062 (-0.111 to -0.013)</b> | <b>0.014</b> |
| CCI                                               | <b>-0.112 (-0.212 to -0.012)</b> | <b>0.028</b> |
| IL-6                                              | <b>-0.081 (-0.146 to -0.017)</b> | <b>0.014</b> |

GDS-KR, Geriatric Depression Scale revised Korean version; CCI, Cognitive Complaint Interview; IL-6, interleukin-6; CI, confidence interval; p < 0.05 is shown in bold.
